# Supplementary material for: Climate change projections of wet and dry extreme events in the Upper Jhelum Basin using a multivariate drought index: Evaluation of bias correction
Source: Copernicus journal article supplement (doi:10.5194/gmd-2022-237), 2022-12-05
Supplement: Supplementary file 1 [file gmd-2022-237-supplement-version4.zip]

Archive with 1 entries (1 files):
- revised-Supplementary Material.pdf
