# Supplementary material for: Climate change projections of wet and dry extreme events in the Upper Jhelum Basin using a multivariate drought index: Evaluation of bias correction
Source: Copernicus journal article supplement (doi:10.5194/gmd-2022-237), 2022-12-05
Supplement: Supplementary file 3 [file gmd-2022-237-supplement.pdf]

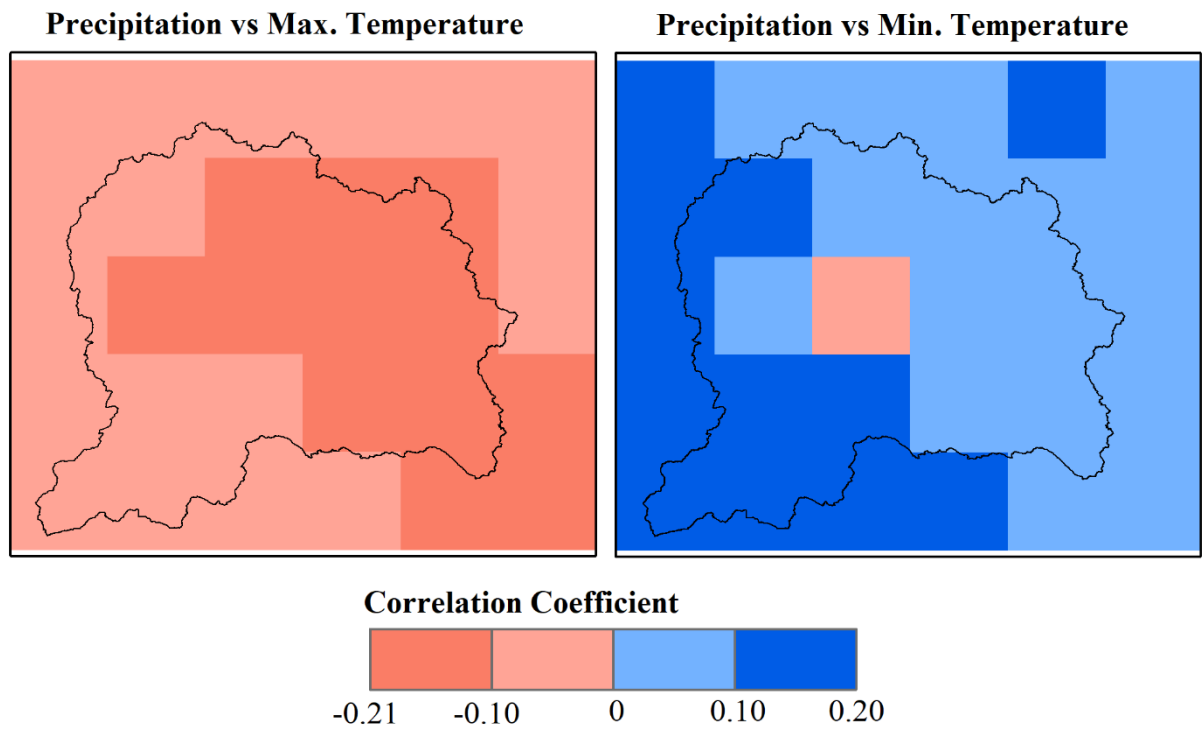

**Figure S1:** Spearman correlation coefficient between precipitation and maximum temperature (left panel) and precipitation and minimum temperature (right panel) for the reference data.

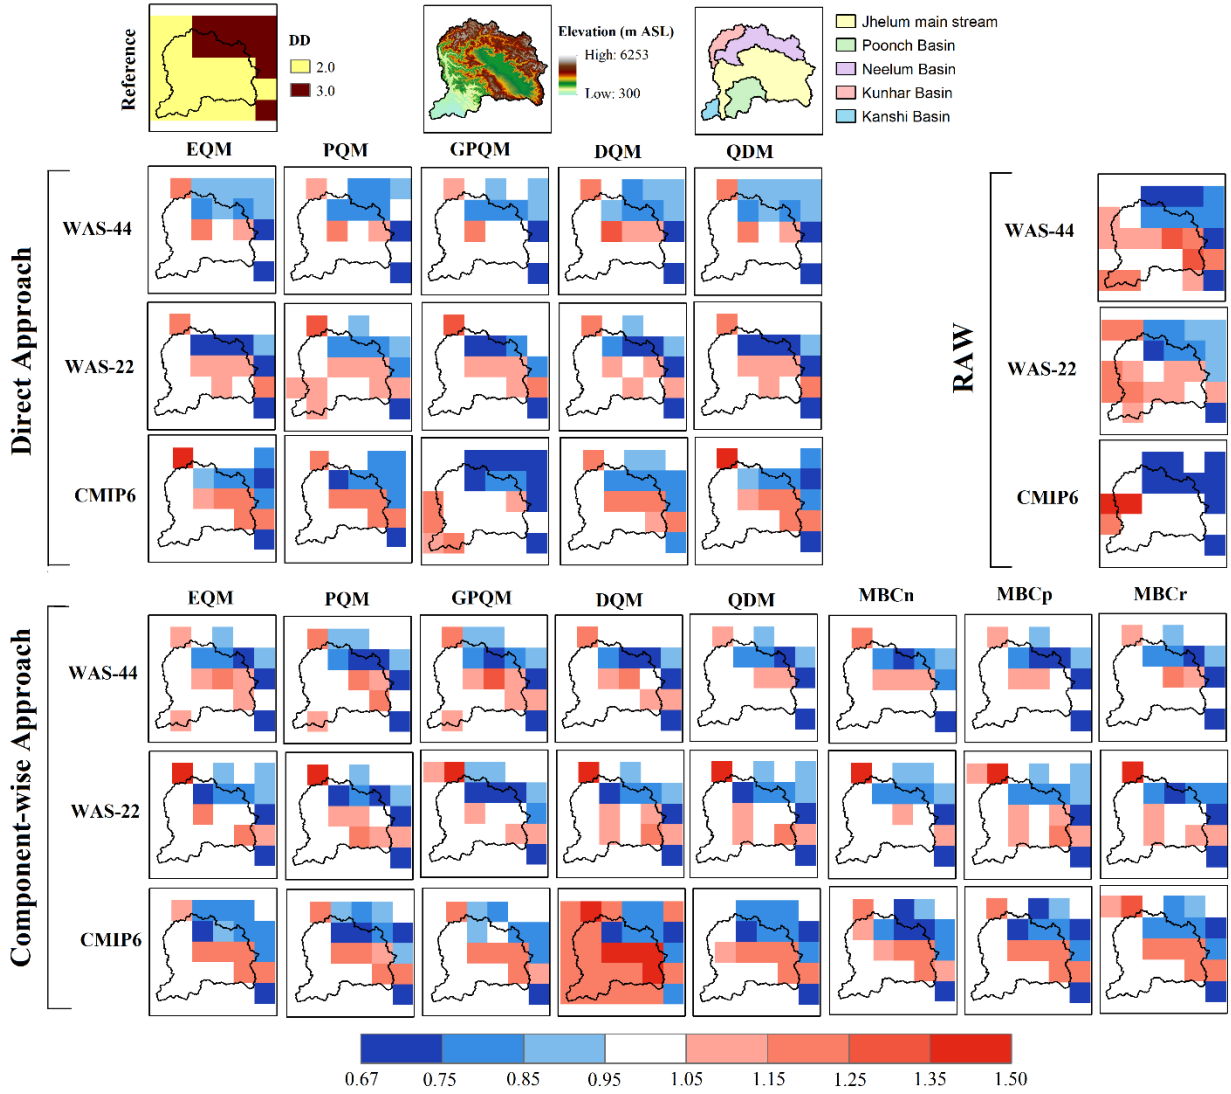

**Figure S2:** Median dry duration (DD) expressed in months in the reference dataset (first row, left), digital elevation model in meter above sea level (first row, center) and location of sub-basins (first row, right), and biases (as a ratio of model to reference) for the multi-model raw ensembles and bias-corrected ensembles, for the two bias correction approaches and all methods (columns).

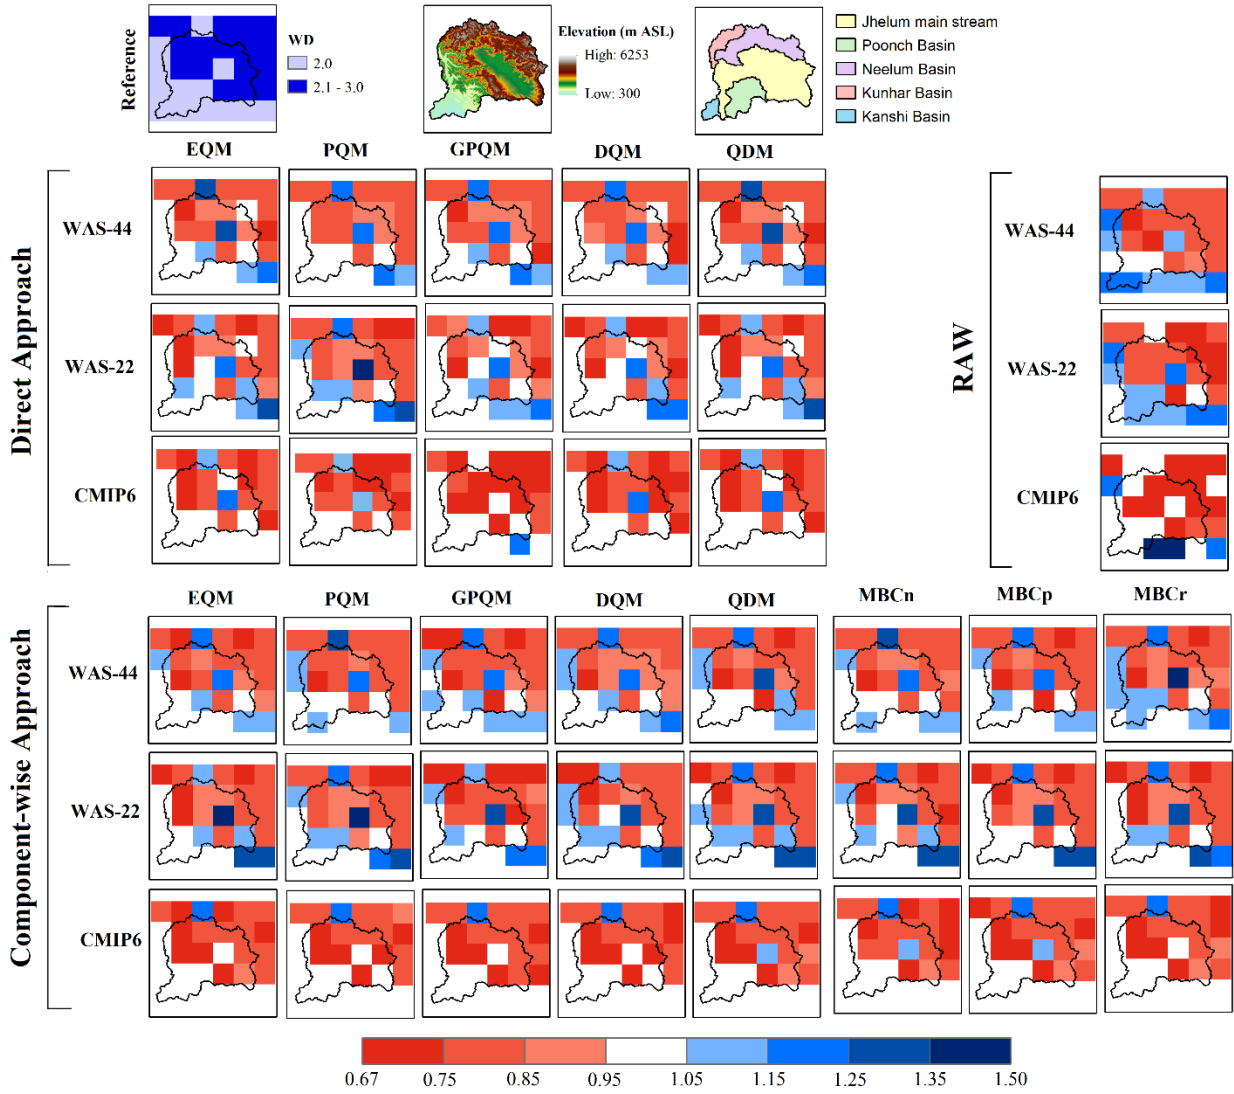

**Figure S3:** Same as figure S2, but for median wet duration (WD) expressed in months.

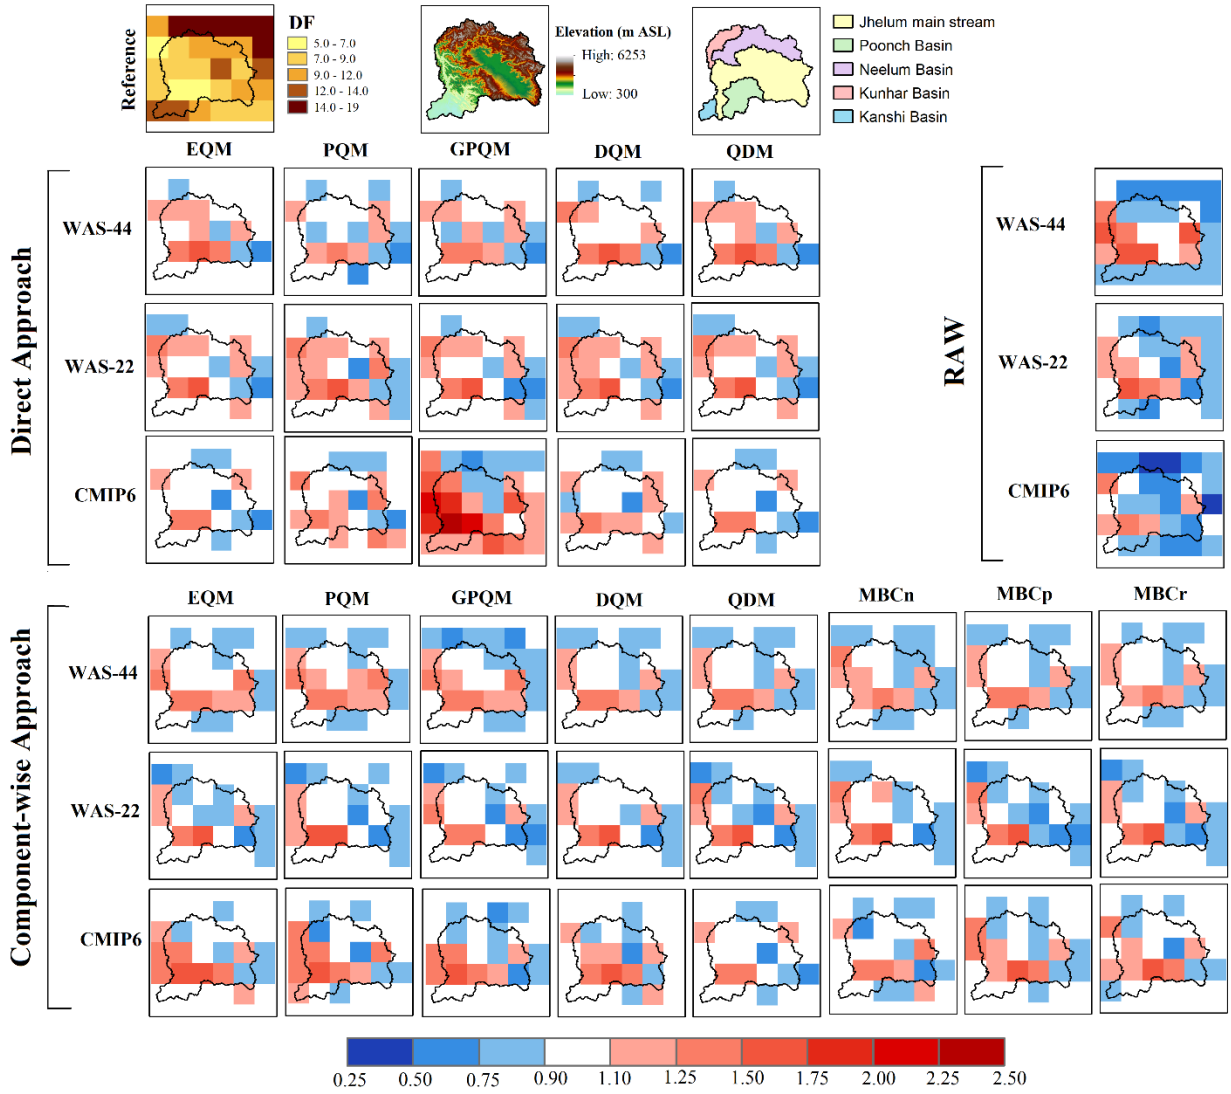

**Figure S4:** Same as figure S2, but for absolute dry frequency (DF) expressed as total number of dry events.

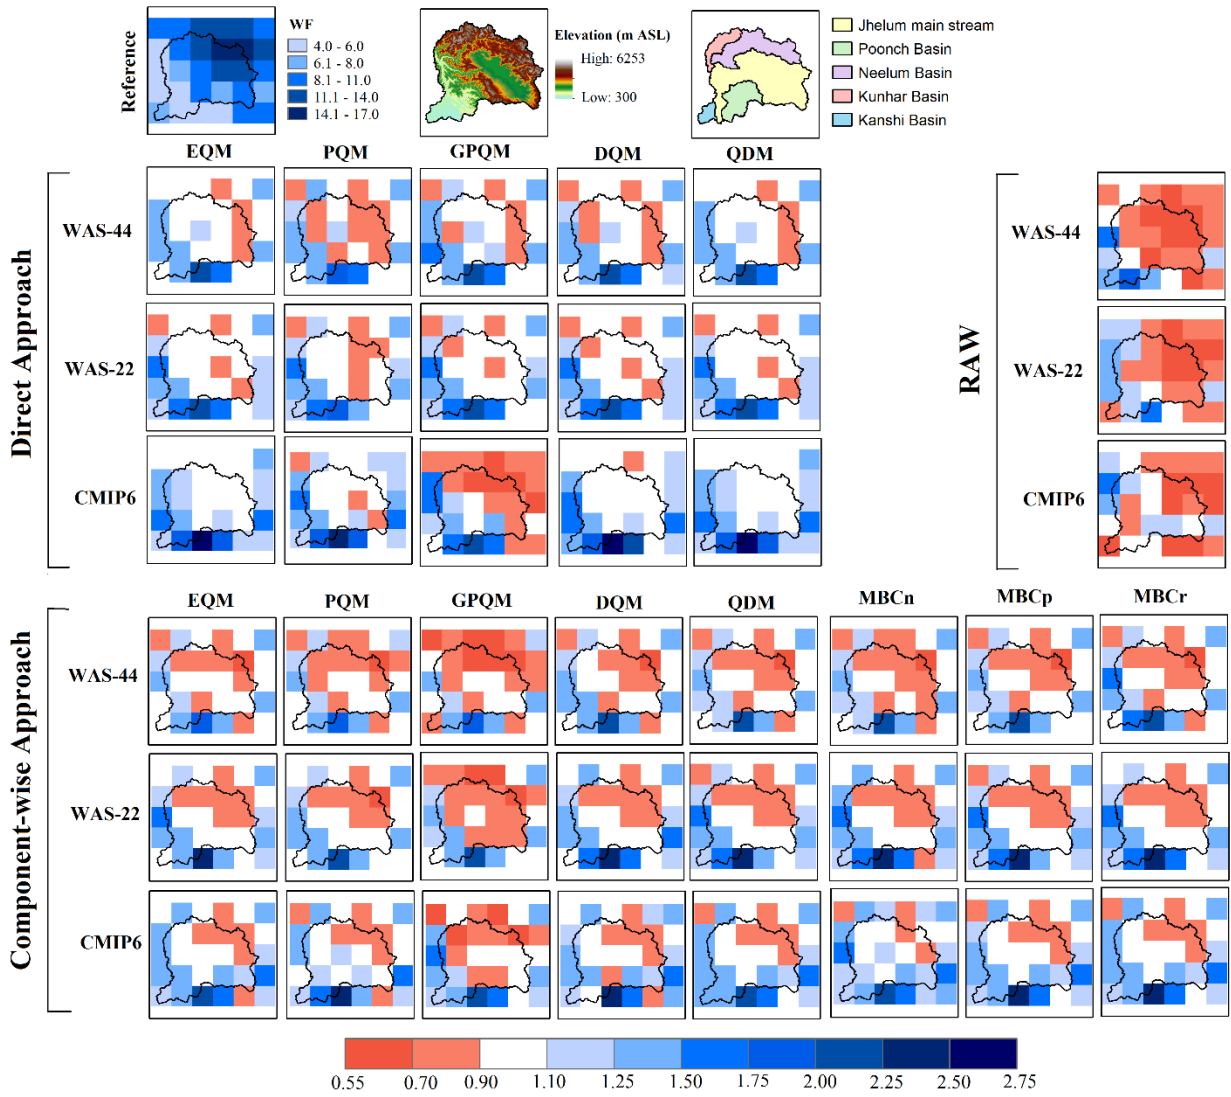

**Figure S5:** Same as figure S2, but for absolute wet frequency (WF) expressed as total number of wet events.
